# Supplementary material for: One-step generation of multiple transgenic mouse lines using an improved Pronuclear Injection-based Targeted Transgenesis (i-PITT)
Source: PubMed Central journal article supplement (PMC4404087; doi:10.1186/s12864-015-1432-5), 2015-04-09
Supplement: 12864_2015_1432_MOESM1_ESM.pdf [file 12864_2015_1432_MOESM1_ESM.pdf]

## Supplementary data

### Supplementary Figures

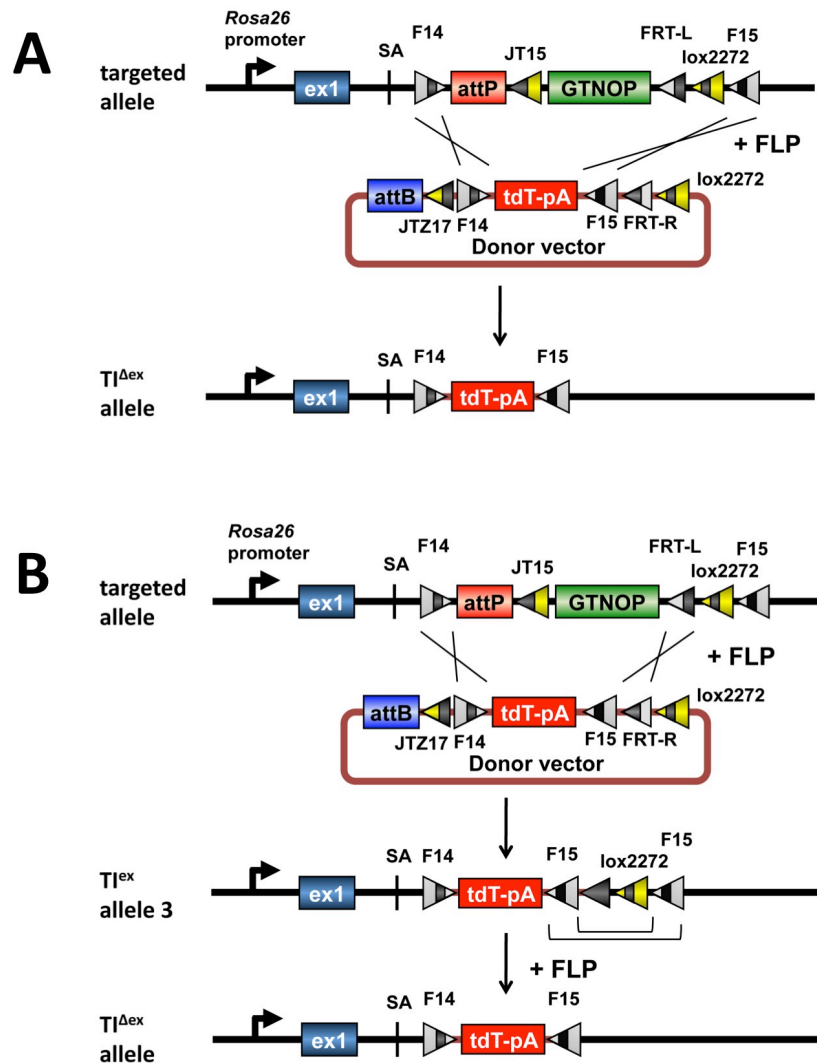

**Figure S1.** Targeted insertion via FLP-FRT system. (A) The FLP-FRT recombination via *F14* and *F15* results in insertion of DOI (tdTomato-pA) into the *Rosa26* locus, leading to generation of  $TI^{\Delta ex}$  allele. (B) The FLP-FRT recombination via *F14* and *FRT-L/R* results in insertion of the DOI into the *Rosa26* locus, resulting in generation of  $TI^{ex}$  allele 3. Note that the recombination via *F14* and *FRT-L/R* requires an additional step to remove sequence between two *F15*s to obtain the final  $TI^{\Delta ex}$  allele, unlike the recombination between *F14* and *F15* which directly results in  $TI^{\Delta ex}$  allele (A).

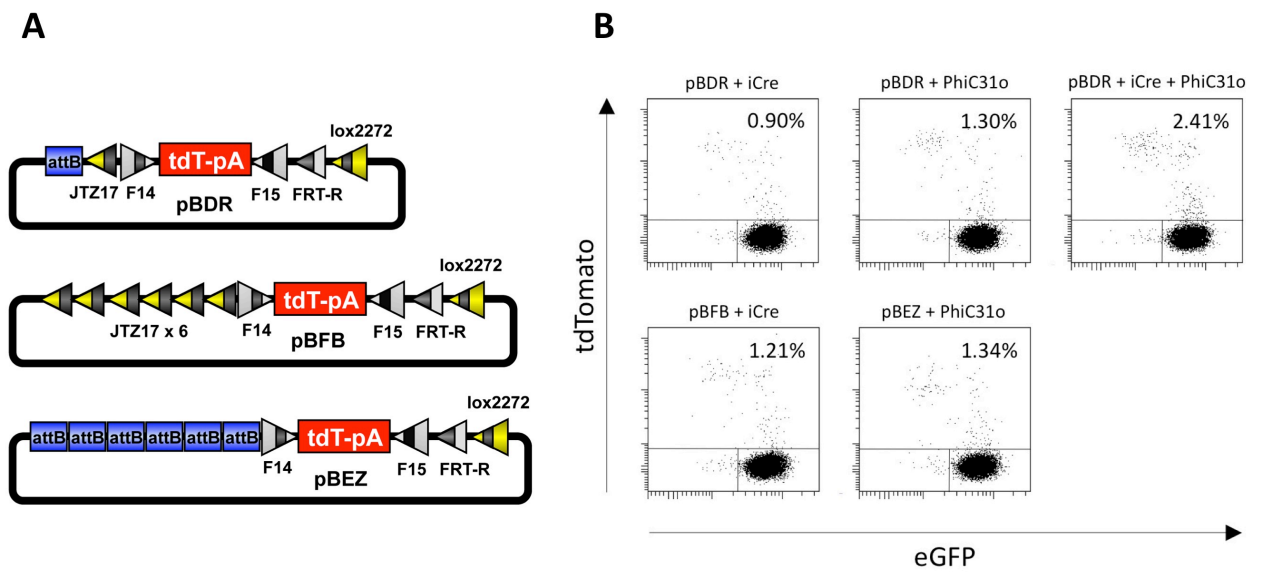

**Figure S2.** Comparison of insertion efficiency. (A) Structures of donor vectors used. (B) Insertion efficiency was examined by introducing the donor vector (pBDR, pBFB or pBEZ) into targeted ES cells (#BDU7) with iCre and/or PhiC31 integrase expression vector. ES cells exhibiting red fluorescence, which can be evaluated by FACS analysis, were regarded as targeted inserted clones.

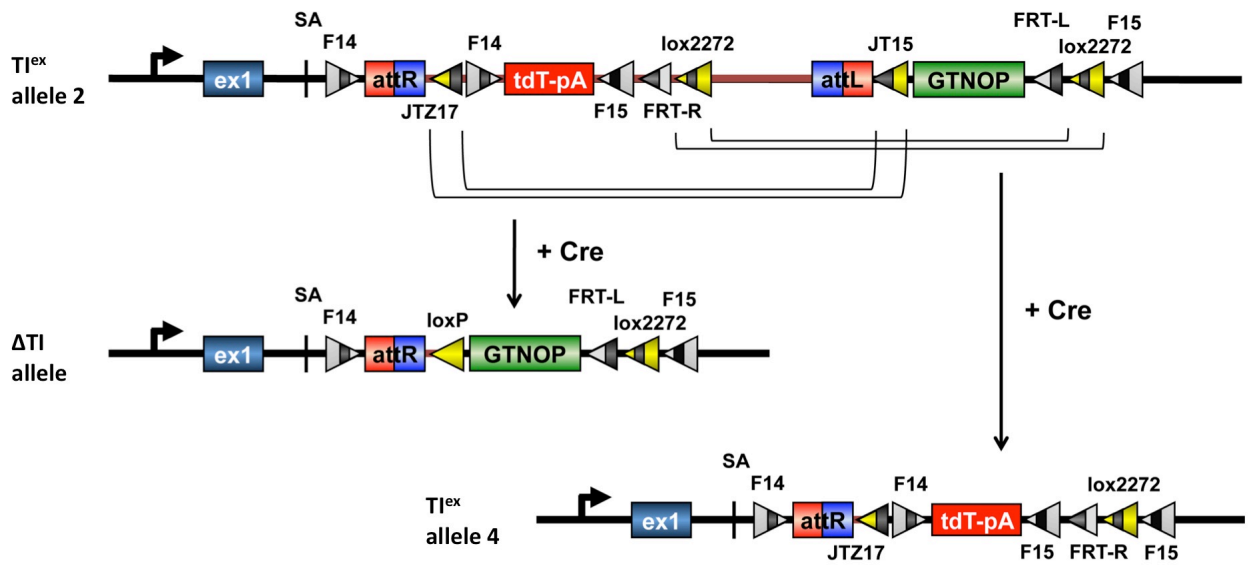

**Figure S3.** Possible outcomes of co-injection of iCre and PhiC31o mRNAs (“PhiC31 first-Cre next” scenario). When iCre and PhiC31o mRNAs are co-injected, TI<sup>ex</sup> allele 2 generated by PhiC31 integrase will be converted into TI<sup>ex</sup> allele 4 or ΔTI allele after Cre-*loxP* recombination via *lox2272* and *JT15/JTZ17*, respectively.

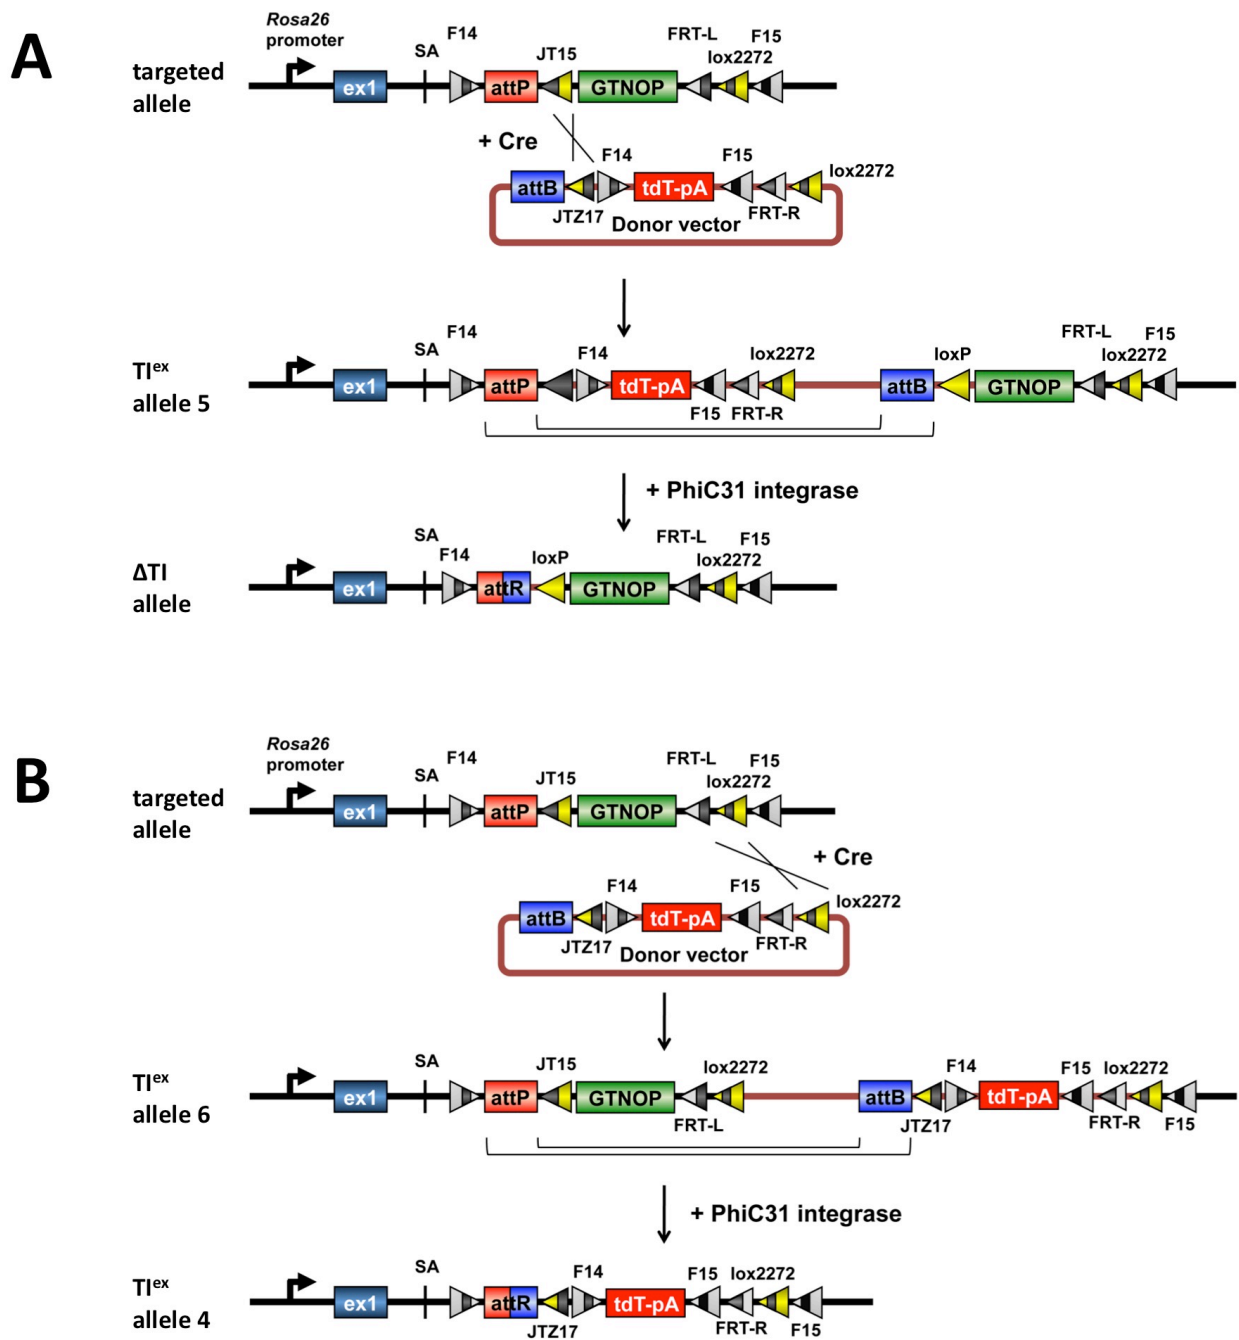

**Figure S4.** Possible outcomes of co-injection of iCre and PhiC31o mRNAs (“Cre first-PhiC31 next” scenario). (A) “Cre via *JT15/JTZ17* first-PhiC31 next” event. The Cre-*loxP*-based insertion via *JT15/JTZ17* generates transient allele,  $TI^{ex}$  allele 5, and then subsequent effect of PhiC31 would result in generation of  $\Delta TI$  allele. (B) “Cre via *lox2272* first-PhiC31 next” event. The Cre-*loxP*-based insertion via *lox2272* generates transient allele,  $TI^{ex}$  allele 6, and then subsequent effect of PhiC31 would result in generation of  $TI^{ex}$  allele 4.

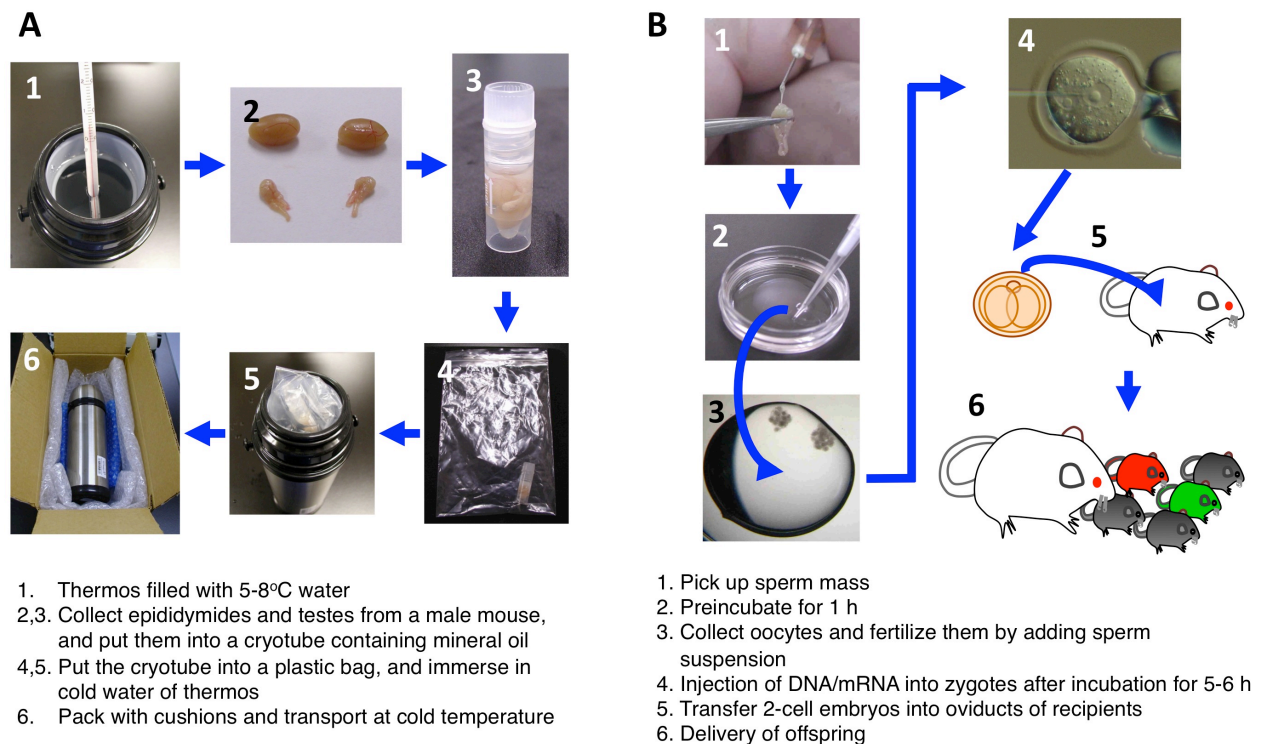

**Figure S5.** *i*-PITT at a distant laboratory using the new seed mice TOKMO-3. (A,B) Schematic of the procedure used in this study. The epididymides of TOKMO-3 collected at Tokai University (the first facility) were transported overnight to RIKEN BRC (the second facility) (A), and was performed in the latter facility IVF to obtain offspring (fertilized eggs) derived from TOKMO-3 (B). (C) The *i*-PITT results at the second facility.

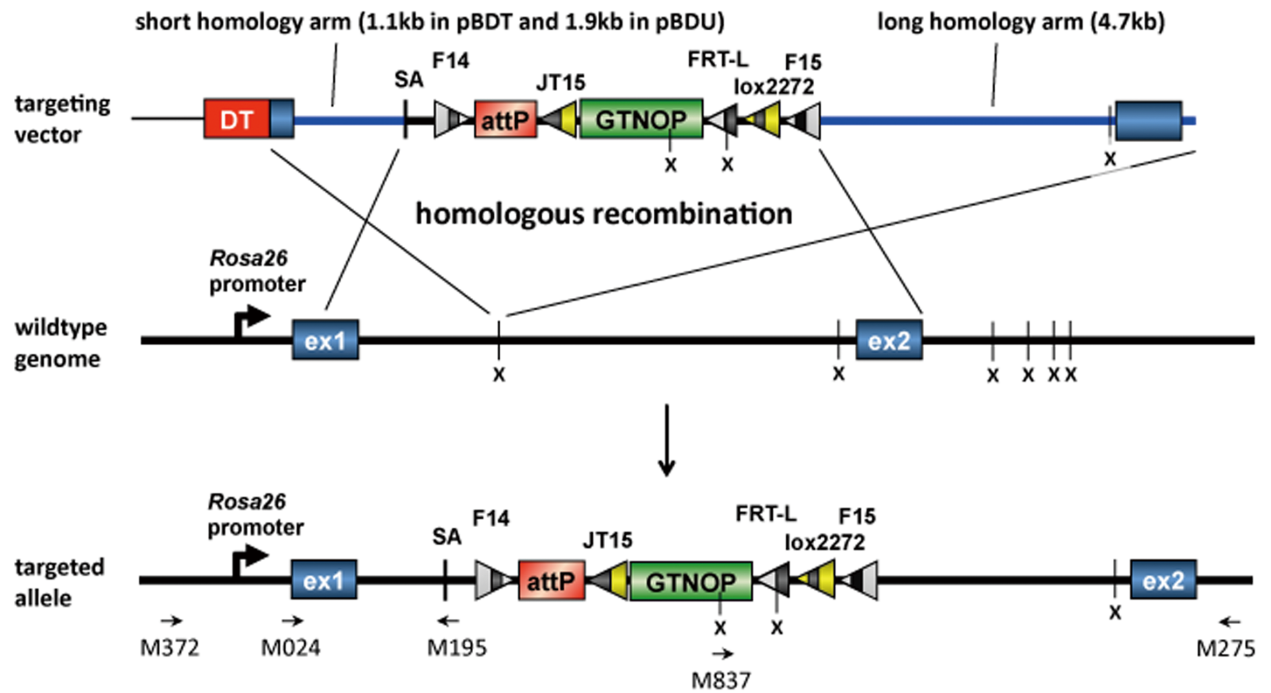

**Figure S6.** Schematic of targeting of *i-PITT-landing-pad* at the *Rosa26* locus. The targeting vector, pBDT (or pBDU: not shown here) comprising diphtheria toxin fragment (DT), short homology arm, splicing acceptor (SA), *F14*, *attP*, *JT15*, GTNOP (see below), *FRT-L*, *lox2272*, *F15* and long homology arm, was inserted into the *Rosa26* locus via homologous recombination in ES cells (E14.1 or EGR-101). Homology arm regions of the targeting vector are shown in blue. G418-resistant clones were picked and the targeted alleles were screened by PCR using primers shown in arrows (see details in Materials and Methods). Resultant ES cell clones, #BDU7 derived from E14.1 and BDT(#73 and #78) derived from EGR-101, were used for *in vitro* study and generation of TOKMO-3 mouse, respectively. GTNOP: a cassette containing “eGFP-T2A-Neomycin resistant gene-hOCT4-polyA”. X: *XbaI* site.

## Supplementary Tables

**Table S1.**

**Table S1.** Optimization of PhiC31o mRNA concentration: survival rates of embryos up to blastocyst stage upon injection of PhiC31o mRNA and donor vector DNA solution

| PhiC31o mRNA concentration (ng/ul) | Eggs injected | Normal <sup>a</sup> | 2-cell (%) <sup>b</sup> | 4-cell (%) <sup>b</sup> | 8-cell (%) <sup>b</sup> | Morula (%) <sup>b</sup> | Blastocyst (%) <sup>b</sup> | Blastocyst with red fluorescence (%) <sup>c</sup> |
|------------------------------------|---------------|---------------------|-------------------------|-------------------------|-------------------------|-------------------------|-----------------------------|---------------------------------------------------|
| 45*                                | 23            | 23                  | 11 (48)                 | 3 (13)                  | 3 (13)                  | 3 (13)                  | 5 (22)                      | 3 (60)                                            |
| 22.5*                              | 23            | 22                  | 14 (64)                 | 8 (36)                  | 7 (32)                  | 7 (32)                  | 8 (36)                      | 2 (25)                                            |
| 11.3*                              | 24            | 23                  | 19 (83)                 | 15 (65)                 | 11 (48)                 | 11 (48)                 | 9 (39)                      | 2 (22)                                            |
| 5.6*                               | 23            | 21                  | 18 (86)                 | 12 (57)                 | 11 (52)                 | 11 (52)                 | 11 (52)                     | 1 (9)                                             |
| 0*                                 | 24            | 23                  | 22 (96)                 | 21 (91)                 | 18 (78)                 | 18 (78)                 | 14 (61)                     | 0 (0)                                             |
| No injection                       | 12            | -                   | 12 (100)                | 12 (100)                | 12 (100)                | 12 (100)                | 11 (92)                     | 0 (0)                                             |

\* pBER donor vector DNA was included at 10 ng/ul concentration along with PhiC31o mRNA.

<sup>a</sup> Embryos with normal morphology were judged as 'normal' just after injection and were cultivated for further scoring. During this period, morphologic change was periodically assessed under a light microscope.

<sup>b</sup> The developmental ratios at each stage were assessed as (no. normal embryos developing) / (no. of normal embryos initially cultured) \* 100.

<sup>c</sup> (Number of normal blastocyst showing red fluorescence) / ( Total number of normal blastocyst) \* 100.

**Table S2.**

**Table S2.** Stepwise injection experiments.

| Experiment   | Donor Vector (size: kb)                   | concentration of donor vectors (ng/μl) | Integration system used | concentration of mRNAs (ng/μl) | Eggs injected | Developed to blastocyst (F0) | Embryos transferred | Pups/Fetuses obtained (F0) | Random integration | Targeted integration (per donor vector) (% of F0; % of injected) | Type of allele: Number           | ATI allele/Number of F0 | Number of mosaic/Number of targeted integration |
|--------------|-------------------------------------------|----------------------------------------|-------------------------|--------------------------------|---------------|------------------------------|---------------------|----------------------------|--------------------|------------------------------------------------------------------|----------------------------------|-------------------------|-------------------------------------------------|
| 1            | pBER (5.99)                               | pBER: 10                               | PhiC31                  | PhiC31o: 15.0                  | 25            | 10                           | -                   | -                          | ND                 | 1 (pBER: 1) (10.0%; 4.0%)                                        | allele 2: 1                      | -                       | ND                                              |
| 2            | pBER (5.99)                               | pBER: 10                               | Cre                     | iCre: 1.0                      | 25            | 7                            | -                   | -                          | ND                 | 2 (pBER: 2) (28.6%; 8.0%)                                        | allele 1: 2                      | -                       | ND                                              |
| 3            | pBER (5.99)                               | pBER: 10                               | Cre/PhiC31              | iCre: 0.5<br>PhiC31o: 7.5      | 25            | 9                            | -                   | -                          | ND                 | 4 (pBER: 4) (44.4%; 16.0%)                                       | allele 1: 2<br>allele 2 or 4: ND | ND                      | ND                                              |
| 4            | pBER (5.99)                               | pBER: 10                               | Cre/PhiC31              | iCre: 1.0<br>PhiC31o: 15.0     | 25            | 16                           | -                   | -                          | ND                 | 3 (pBER: 3) (18.8%; 12.0%)                                       | allele 2 or 4: 3                 | ND                      | ND                                              |
| 5            | pBER (5.99)                               | pBER: 10                               | PhiC31                  | PhiC31o: 15.0                  | 41            | 20                           | -                   | -                          | ND                 | 4 (pBER: 4) (20.0%; 9.8%)                                        | ND                               | ND                      | ND                                              |
| 6            | pBER (5.99)                               | pBER: 10                               | Cre                     | iCre: 1.0                      | 42            | 14                           | -                   | -                          | ND                 | 4 (pBER: 4) (28.6%; 9.5%)                                        | ND                               | ND                      | ND                                              |
| 7            | pBER (5.99)                               | pBER: 10                               | Cre/PhiC31              | iCre: 0.5<br>PhiC31o: 7.5      | 41            | 13                           | -                   | -                          | ND                 | 8 (pBER: 8) (61.5%; 19.5%)                                       | ND                               | ND                      | ND                                              |
| 8            | pBER (5.99)                               | pBER: 10                               | Cre/PhiC31              | iCre: 1.0<br>PhiC31o: 15.0     | 45            | 15                           | -                   | -                          | ND                 | 7 (pBER: 7) (46.7%; 15.6%)                                       | ND                               | ND                      | ND                                              |
| 9            | pBER (5.99)                               | pBER: 10                               | Cre/PhiC31              | iCre: 0.5<br>PhiC31o: 7.5      | 100           | 46                           | -                   | -                          | ND                 | 13 (pBER: 13) (28.3%; 13.0%)                                     | allele 1: 9<br>allele 2 or 4: 4  | ND                      | ND                                              |
| 10           | pBER (5.99)                               | pBER: 10                               | Cre/PhiC31              | iCre: 1.0<br>PhiC31o: 15.0     | 100           | 47                           | -                   | -                          | ND                 | 13 (pBER: 13) (27.7%; 13.0%)                                     | allele 1: 5<br>allele 2 or 4: 8  | ND                      | ND                                              |
| 11           | pBGW (3.25)<br>pBDR (3.96)<br>pBGV (3.25) | pBGW: 3.3<br>pBDR: 3.3<br>pBGV: 3.3    | Cre/PhiC31              | iCre: 0.5<br>PhiC31o: 7.5      | 89            | 22                           | -                   | -                          | ND                 | 5 (pBGW: 3, pBDR: 2, pBGV: 0) (22.7%; 5.6%)                      | allele 1: 1<br>allele 2 or 4: 4  | ND                      | ND                                              |
| 12           | pBER (5.99)                               | pBER: 10                               | Cre/PhiC31              | iCre: 0.5<br>PhiC31o: 7.5      | 120           | -                            | 113                 | 28                         | ND                 | 2 (pBER: 2) (7.1%; 1.7%)                                         | allele 1: 1<br>allele 4: 1       | 0/28                    | 1/2                                             |
| 13           | pBER (5.99)                               | pBER: 10                               | Cre/PhiC31              | iCre: 0.5<br>PhiC31o: 7.5      | 122           | -                            | 114                 | 23                         | ND                 | 4 (pBER: 4) (17.4%; 3.3%)                                        | allele 4: 2<br>allele 2 or 4: 1  | 1/23                    | 2/4                                             |
| 14           | pBGW (3.25)<br>pBDR (3.96)<br>pBGV (3.25) | pBGW: 3.3<br>pBDR: 3.3<br>pBGV: 3.3    | Cre/PhiC31              | iCre: 0.5<br>PhiC31o: 7.5      | 118           | 15                           | -                   | -                          | ND                 | 3 (pBGW: 2, pBDR: 1, pBGV: 0) (20.0%; 2.5%)                      | allele 1: 2<br>allele 2 or 4: 1  | ND                      | ND                                              |
| 15           | pBGX (3.59)<br>pBGT (3.47)                | pBGX: 5<br>pBGT: 5                     | Cre/PhiC31              | iCre: 0.5<br>PhiC31o: 7.5      | 150           | -                            | 143                 | 12                         | 0                  | 3 (pBGX: 1, pBGT: 2) (25.0%; 2.0%)                               | allele 1: 1<br>allele 4: 2       | 0/12                    | 1/3                                             |
| 16           | pBGW (3.25)<br>pBDR (3.96)                | pBGW: 5<br>pBDR: 5                     | Cre/PhiC31              | iCre: 0.5<br>PhiC31o: 7.5      | 166           | -                            | 153                 | 17                         | ND                 | 3 (pBGW: 2, pBDR: 1) (17.6%; 1.8%)                               | allele 1: 1<br>allele 4: 2       | 0/17                    | 0/3                                             |
| 17           | pBGO (5.19)                               | pBGO: 10                               | Cre/PhiC31              | iCre: 0.5<br>PhiC31o: 7.5      | 202           | -                            | 198                 | 31                         | ND                 | 8 (pBGO: 8) (25.8%; 4.0%)                                        | allele 4: 8                      | 1/31                    | 3/8                                             |
| 18           | pBGW (3.25)<br>pBDR (3.96)                | pBGW: 5<br>pBDR: 5                     | Cre/PhiC31              | iCre: 0.5<br>PhiC31o: 7.5      | 170           | -                            | 140                 | 44                         | ND                 | 4 (pBGW: 4, pBDR: 0) (9.1%; 2.4%)                                | allele 4: 4                      | 0/44                    | ND                                              |
| 19           | pBGW (3.25)<br>pBDR (3.96)<br>pBGV (3.25) | pBGW: 3.3<br>pBDR: 3.3<br>pBGV: 3.3    | Cre/PhiC31              | iCre: 0.5<br>PhiC31o: 7.5      | 181           | -                            | 167                 | 14                         | ND                 | 4 (pBGW: 1, pBDR: 2, pBGV: 1) (28.6%; 2.2%)                      | allele 4: 4                      | 2/14                    | ND                                              |
| <b>Total</b> |                                           |                                        |                         |                                | <b>1787</b>   | <b>234</b>                   | <b>1028</b>         | <b>169</b>                 | <b>95</b>          |                                                                  |                                  | <b>4/169</b>            | <b>7/20</b>                                     |



**Table S3.**

**Table S3.** Primers used in the present study.

---

|      |                                                                                                 |
|------|-------------------------------------------------------------------------------------------------|
| #235 | TGGTATCTGCGCTCTGC                                                                               |
| M022 | TGAGCGGTGCGGGCGGGTGCAA                                                                          |
| M024 | CCTAAAGAAGAGGCTGTGCTTGG                                                                         |
| M026 | GGTGGTGAGATGAACTTCAG                                                                            |
| M026 | GGTGGTGAGATGAACTTCAG                                                                            |
| M077 | CCATTGTACAGTCTGCAC                                                                              |
| M195 | CATCAAGGAAACCTGGACTACTG                                                                         |
| M273 | TCAGTAAGGGAGCTGCAGTGG                                                                           |
| M274 | CGATGGAAAATACTCCGAGGC                                                                           |
| M275 | CACATTGCATGGATTATACAAGGTG                                                                       |
| M338 | CTCTTTGATGACGGCCATGTT                                                                           |
| M372 | GTTGCTGGTGAAGACGTTACAC                                                                          |
| M376 | TGCATTCTAGTTGTGGTTTGTCC                                                                         |
| M645 | CACCATCGACAAGCACTACG                                                                            |
| M646 | GATTCTGGCCTTGTGCTTC                                                                             |
| M753 | CTGGGAGAAATCCCTTCCCTCTTCCCTCGTGATCTGCAACTCCAGTCTTGATATCAAACTCTCTTAAGGTAGCATTCTGCACGTTCAAAG      |
| M754 | CTGCAGGACAACGCCACACACCAGGTTAGCCTTTAAGCCTGCCAGAGAATATCGTACTCTTAGACCCTTATAGTTACGAAGAATCCAGCATGAGA |
| M837 | TCAGCCATACCACATTGTAGAG                                                                          |
| M839 | AGTACTCTTGGCCATCTCG                                                                             |
| M873 | ATACCGGTGCGCCACCATGGCCGAAGGGAGCGT                                                               |
| M874 | ATGGCCGGCCTTATTCTTCCATCACGCCAATC                                                                |
| M879 | TTGCTCACCATGGTGGCGACCGGTGA                                                                      |
| M953 | TGGGTAACTTTGGGCTC                                                                               |
| M954 | GGAGAGAAGGAGCCACAAAC                                                                            |
| M955 | AGCCCAAGCTTACCGGTGA                                                                             |
| M958 | TGGGTAACTTTGAGTTCTC                                                                             |

---

**Table S4.****Table S4.** List of recombinase/integrase recognition sites used in this study

| recombinase/integrase recognition sites | sequence                                            | recognized by                              | recombines or integrates with |
|-----------------------------------------|-----------------------------------------------------|--------------------------------------------|-------------------------------|
| attB                                    | CCGCGGTGCGGGTGCCAGGGCGTGCCTTGGGCTCCCCGGGCGCTACTCCAC | PhiC31 integrase                           | attP                          |
| attP                                    | GTAGTGCCCCAACTGGGGTAACTTTGAGTTCTCTCAGTTGGGGCGTAG    | PhiC31 integrase                           | attB                          |
| attR                                    | GTAGTGCCCCAACTGGGGTAACTTTGGGCTCCCCGGGCGCTACTCCAC    | not by PhiC31 integrase without assistance | attL                          |
| attL                                    | CCGCGGTGCGGGTGCCAGGGCGTGCCTTGGGCTCTCAGTTGGGGCGTAG   | not by PhiC31 integrase without assistance | attR                          |
| JT15                                    | AATTATTCGTATAGCATAATTATACGAAGTTAT                   | Cre recombinase                            | JTZ17                         |
| JTZ17                                   | ATAACTTCGTATAGCATAATTATAGCAATTTAT                   | Cre recombinase                            | JT15                          |
| lox2272                                 | ATAACTTCGTATAGGATACTTTATACGAAGTTAT                  | Cre recombinase                            | lox2272                       |
| F14                                     | GAAGTTCCTATTCGAAAGTTCCTATTCTATCAGAAGTATAGGAACTTC    | FLP recombinase                            | F14                           |
| F15                                     | GAAGTTCCTATTCGAAAGTTCCTATTCTATAGGAGTATAGGAACTTC     | FLP recombinase                            | F15                           |
| FRT-R                                   | GAAGTTCCTATTCGAAAGTTCCTATTCTAGAAAGTATATGAACTTC      | FLP recombinase                            | FRT-L                         |
| FRT-L                                   | GAAGTTCCTATTCGAAAGTTCATATTCTCTAGAAAGTATAGGAACTTC    | FLP recombinase                            | FRT-R                         |
